# Supplementary material
Source: Springer Nature journal article supplement (https://www.springermedizin.de/resource/supplementary/12885_2004_237_MOESM3_ESM.pdf/9469346)

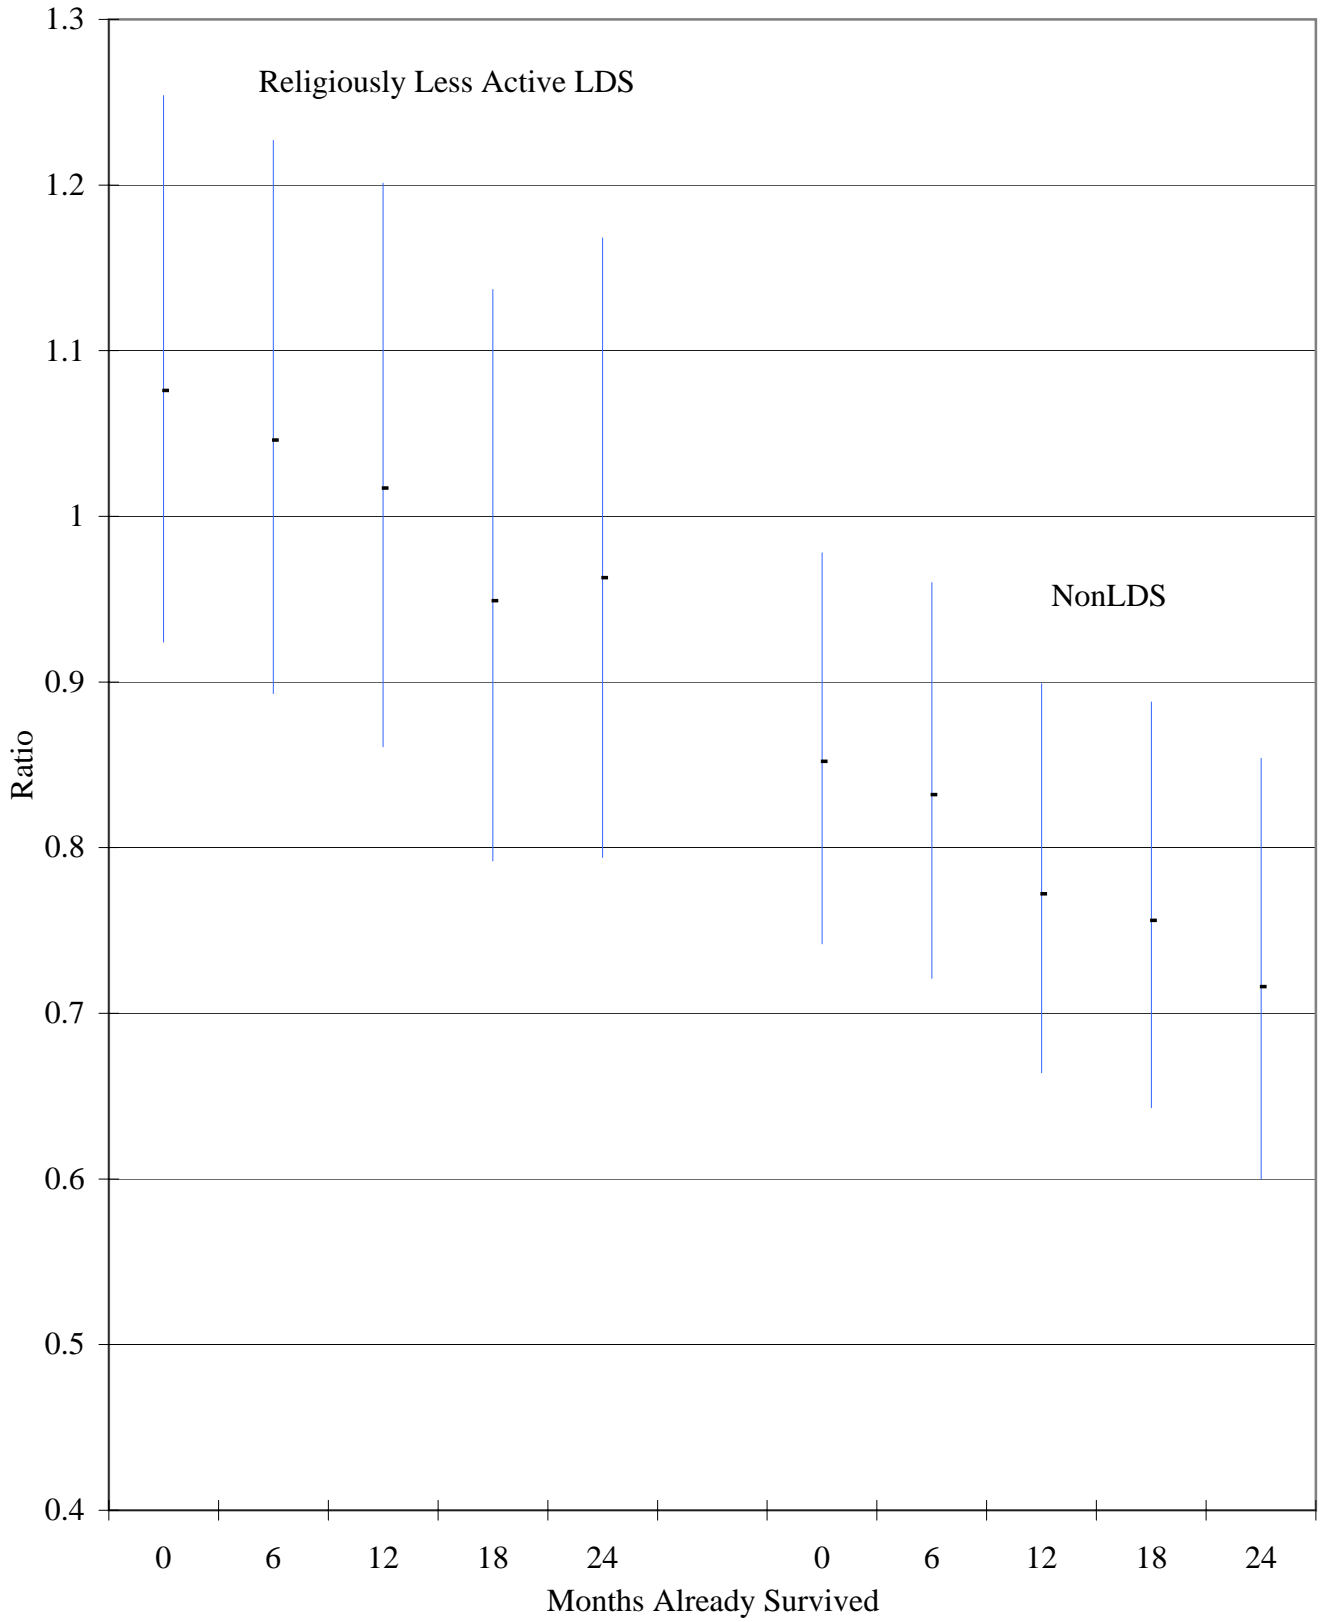

Hazard ratios are adjusted for age and marital status.

Supplement: MOESM3 [file 9469346]
